# Supplementary material
Source: PubMed Central journal article supplement (PMC9389944)
Supplement: NIHMS1764271-supplement-Supplementary_Materials.pdf [file NIHMS1764271-supplement-Supplementary_Materials.pdf]

Honigberg MC, Ye Y, Dattilo L, et al. Polygenic Risk, Frequency of Depressed Mood, and Cardiometabolic Disease.

SUPPLEMENTARY MATERIALS

|                                                                                                                                                                                                                               | Page No. |
|-------------------------------------------------------------------------------------------------------------------------------------------------------------------------------------------------------------------------------|----------|
| <b>Supplementary Table 1.</b> Baseline characteristics of included vs. excluded individuals.                                                                                                                                  | 2        |
| <b>Supplementary Table 2.</b> Association of low and moderate vs. high frequency of depressed mood with outcomes in the full cohort.                                                                                          | 3        |
| <b>Supplementary Table 3.</b> Hazard ratios for incident cardiometabolic disease associated with frequency of depression among individuals at high polygenic risk.                                                            | 5        |
| <b>Supplementary Table 4.</b> Hazard ratios for incident cardiometabolic and cardiovascular disease associated with frequency of depression, excluding individuals with prevalent cardiometabolic and cardiovascular disease. | 6        |
| <b>Supplementary Table 5.</b> Hazard ratios for incident cardiometabolic disease associated with frequency of depression, accounting for antidepressant medication use.                                                       | 7        |
| <b>Supplementary Table 6.</b> Hazard ratios for incident cardiometabolic and cardiovascular disease, with follow-up truncated at December 31, 2019.                                                                           | 8        |
| <b>Supplementary Table 7.</b> Hazard ratios for incident cardiometabolic disease associated with Patient Health Questionnaire-2 (PHQ-2) score.                                                                                | 9        |
| <b>Supplementary Table 8.</b> Interactions between polygenic risk and frequency of depressed mood.                                                                                                                            | 10       |
| <b>Supplementary Table 9.</b> Hazard ratios for incident coronary artery disease associated with frequency of depressed mood, stratified by polygenic risk tier.                                                              | 11       |
| <b>Supplementary Table 10.</b> Interactions between polygenic risk and frequency of depressed mood for total coronary artery disease (prevalent and incident).                                                                | 12       |
| <b>Supplementary Table 11.</b> Sex-stratified models for incident coronary artery disease.                                                                                                                                    | 13       |
| <b>Supplementary Appendix.</b> <i>International Classification of Diseases</i> codes used to ascertain incident coronary artery disease, type 2 diabetes mellitus, and atrial fibrillation in the UK Biobank.                 | 14       |

**Supplementary Table 1. Baseline characteristics of included vs. excluded individuals.**

| <b>Characteristic</b>                     | <b>Excluded<br/>(n=32,316)</b> | <b>Included<br/>(N=328,152)</b> |
|-------------------------------------------|--------------------------------|---------------------------------|
| Age, years                                | 59.0 (7.6)                     | 56.8 (7.9)                      |
| Female sex                                | 19,228 (59.5%)                 | 173,333 (52.8%)                 |
| Townsend deprivation index (median [IQR]) | -1.6 [-3.3, 1.6]               | -2.4 [-3.8, -0.1]               |
| Smoking status                            |                                |                                 |
| • Current                                 | 4,690 (15.0%)                  | 31,441 (9.6%)                   |
| • Former                                  | 10,924 (35.0%)                 | 116,041 (35.4%)                 |
| • Never                                   | 15,597 (50.0%)                 | 180,670 (55.1%)                 |
| Body mass index, kg/m <sup>2</sup>        | 28.5 (5.3)                     | 27.3 (4.6)                      |
| Systolic blood pressure                   | 142.8 (20.1)                   | 140 (19.6)                      |
| Antihypertensive medication use           | 9,231 (28.6%)                  | 65,869 (20.1%)                  |
| Cholesterol-lowering medication use       | 7,717 (23.9%)                  | 55,075 (16.8%)                  |
| Non-HDL cholesterol, mg/dL                | 165.7 (44.0)                   | 164.9 (41.5)                    |
| C-reactive protein, mg/L (median [IQR])   | 1.8 [0.9, 3.8]                 | 1.3 [0.6, 2.6]                  |
| Coronary artery disease                   | 2,109 (6.5%)                   | 13,259 (4.0%)                   |
| Type 2 diabetes mellitus                  | 1,245 (3.9%)                   | 6,903 (2.1%)                    |
| Atrial fibrillation                       | 702 (2.2%)                     | 5,671 (1.7%)                    |

Values are displayed as mean (SD) or n (%) unless otherwise specified.

**Supplementary Table 2. Absolute incidence rates for coronary artery disease, type 2 diabetes mellitus, and atrial fibrillation by polygenic risk and frequency of depressed mood.**

| Polygenic risk category         | Frequency of depressed mood | Number of participants at risk | Events / person-years | Incidence rate per 1,000 person-years (95% CI) | Incidence rate difference (vs. highest frequency of depressed mood) (95% CI) | P-value                |
|---------------------------------|-----------------------------|--------------------------------|-----------------------|------------------------------------------------|------------------------------------------------------------------------------|------------------------|
| <b>Coronary artery disease</b>  |                             |                                |                       |                                                |                                                                              |                        |
| High                            | High                        | 2,510                          | 260 / 26,747          | 9.72<br>(8.54-10.90)                           | Reference                                                                    | --                     |
| High                            | Moderate                    | 11,305                         | 882 / 121,624         | 7.25<br>(6.77-7.73)                            | -2.47<br>(-3.74 to -1.19)                                                    | 1.5x10 <sup>-4</sup>   |
| High                            | Low                         | 47,034                         | 3,849 / 505,565       | 7.61<br>(7.37-7.85)                            | -2.11<br>(-3.31 to -0.90)                                                    | 6.1x10 <sup>-4</sup>   |
| Intermediate                    | High                        | 7,441                          | 565 / 80,185          | 7.05<br>(6.47-7.63)                            | Reference                                                                    | --                     |
| Intermediate                    | Moderate                    | 34,561                         | 1,909 / 376,361       | 5.07<br>(4.84-5.30)                            | -1.97<br>(-2.60 to -1.35)                                                    | 5.6x10 <sup>-10</sup>  |
| Intermediate                    | Low                         | 147,593                        | 7,972 /<br>1,609,235  | 4.95<br>(4.85-5.06)                            | -2.09<br>(-2.68 to -1.50)                                                    | 4.0x10 <sup>-12</sup>  |
| Low                             | High                        | 2,449                          | 143 / 26,623          | 5.37<br>(4.49-6.25)                            | Reference                                                                    | --                     |
| Low                             | Moderate                    | 11,707                         | 452 / 128,460         | 3.52<br>(3.19-3.84)                            | -1.85<br>(-2.79 to -0.91)                                                    | 1.1x10 <sup>-4</sup>   |
| Low                             | Low                         | 50,292                         | 1,848 / 552,728       | 3.34<br>(3.19-3.50)                            | -2.03<br>(-2.92 to -1.13)                                                    | 8.6x10 <sup>-6</sup>   |
| <b>Type 2 diabetes mellitus</b> |                             |                                |                       |                                                |                                                                              |                        |
| High                            | High                        | 2,520                          | 314 / 26,517          | 11.84<br>(10.53-13.15)                         | Reference                                                                    | --                     |
| High                            | Moderate                    | 11,622                         | 916 / 124,939         | 7.33<br>(6.86-7.81)                            | -4.51<br>(-5.90 to -3.12)                                                    | 2.2x10 <sup>-10</sup>  |
| High                            | Low                         | 48,832                         | 3,597 / 526,273       | 6.83<br>(6.61-7.05)                            | -5.01<br>(-6.34 to -3.68)                                                    | 1.5x10 <sup>-13</sup>  |
| Intermediate                    | High                        | 7,575                          | 523 / 81,770          | 6.40<br>(5.85-6.94)                            | Reference                                                                    | --                     |
| Intermediate                    | Moderate                    | 35,118                         | 1,594 / 383,993       | 4.15<br>(3.94-4.35)                            | -2.25<br>(-2.83 to -1.66)                                                    | 5.3x10 <sup>-14</sup>  |
| Intermediate                    | Low                         | 150,472                        | 6,022 /<br>1,651,081  | 3.65<br>(3.56-3.74)                            | -2.75<br>(-3.30 to -2.19)                                                    | <2.2x10 <sup>-16</sup> |
| Low                             | High                        | 2,528                          | 100 / 27,818          | 3.59<br>(2.89-4.30)                            | Reference                                                                    | --                     |
| Low                             | Moderate                    | 11,813                         | 259 / 130,651         | 1.98<br>(1.74-2.22)                            | -1.61<br>(-2.36 to -0.87)                                                    | 2.2x10 <sup>-5</sup>   |
| Low                             | Low                         | 50,768                         | 1,020 / 562,424       | 1.81<br>(1.70-1.92)                            | -1.78<br>(-2.49 to -1.07)                                                    | 9.9x10 <sup>-7</sup>   |

|              |          | <b>Atrial fibrillation</b> |                      |                     |                           |                      |
|--------------|----------|----------------------------|----------------------|---------------------|---------------------------|----------------------|
| High         | High     | 2,573                      | 195 / 27,804         | 7.01<br>(6.03-8.00) | Reference                 | --                   |
| High         | Moderate | 11,683                     | 741 / 127,107        | 5.83<br>(5.41-6.25) | -1.18<br>(-2.25 to -0.11) | 0.03                 |
| High         | Low      | 49,158                     | 3,843 / 531,231      | 7.23<br>(7.01-7.46) | +0.22<br>(-0.79 to +1.23) | 0.67                 |
| Intermediate | High     | 7,796                      | 378 / 85,468         | 4.42<br>(3.98-4.87) | Reference                 | --                   |
| Intermediate | Moderate | 35,418                     | 1,393 / 389,586      | 3.58<br>(3.39-3.76) | -0.85<br>(-1.33 to -0.36) | 6.0x10 <sup>-4</sup> |
| Intermediate | Low      | 150,722                    | 7,004 /<br>1,652,523 | 4.24<br>(4.14-4.34) | -0.18<br>(-0.64 to +0.27) | 0.43                 |
| Low          | High     | 2,558                      | 68 / 28,232          | 2.41<br>(1.84-2.98) | Reference                 | --                   |
| Low          | Moderate | 11,899                     | 336 / 131,201        | 2.56<br>(2.29-2.83) | +0.15<br>(-0.48 to +0.79) | 0.64                 |
| Low          | Low      | 50,673                     | 1,439 / 559,929      | 2.57<br>(2.44-2.70) | +0.16<br>(-0.42 to +0.75) | 0.59                 |

Two-sided P-values (unadjusted for multiple comparisons) were calculated from the chi-squared statistic for the difference in incidence rates using the 'fmsb' package in R version 3.6.0.

**Supplementary Table 3. Hazard ratios for incident cardiometabolic disease associated with frequency of depression among individuals at high polygenic risk (i.e., individuals in the top quintile of polygenic risk).**

| Condition                | Frequency of depressed mood | No. at risk | Model 1               |                        | Model 2               |                       |
|--------------------------|-----------------------------|-------------|-----------------------|------------------------|-----------------------|-----------------------|
|                          |                             |             | Hazard ratio (95% CI) | P-value                | Hazard ratio (95% CI) | P-value               |
| Coronary artery disease  | High                        | 2,510       | 1.00<br>(reference)   | --                     | 1.00<br>(reference)   | --                    |
|                          | Moderate                    | 11,305      | 0.73<br>(0.64-0.84)   | 1.0x10 <sup>-5</sup>   | 0.77<br>(0.66-0.90)   | 9.5x10 <sup>-4</sup>  |
|                          | Low                         | 47,034      | 0.62<br>(0.54-0.70)   | 7.2x10 <sup>-14</sup>  | 0.70<br>(0.61-0.81)   | 1.2x10 <sup>-6</sup>  |
| Type 2 diabetes mellitus | High                        | 2,520       | 1.00<br>(reference)   | --                     | 1.00<br>(reference)   | --                    |
|                          | Moderate                    | 11,622      | 0.63<br>(0.55-0.71)   | 7.8x10 <sup>-13</sup>  | 0.78<br>(0.68-0.90)   | 7.6x10 <sup>-4</sup>  |
|                          | Low                         | 48,832      | 0.50<br>(0.44-0.56)   | <2.2x10 <sup>-16</sup> | 0.66<br>(0.57-0.75)   | 3.0x10 <sup>-10</sup> |
| Atrial fibrillation      | High                        | 2,573       | 1.00<br>(reference)   | --                     | 1.00<br>(reference)   | --                    |
|                          | Moderate                    | 11,683      | 0.83<br>(0.71-0.97)   | 0.02                   | 0.88<br>(0.74-1.05)   | 0.16                  |
|                          | Low                         | 49,158      | 0.79<br>(0.68-0.91)   | 0.001                  | 0.87<br>(0.74-1.02)   | 0.10                  |

Two-sided P-values (unadjusted for multiple comparisons) were calculated using multivariable-adjusted Cox proportional hazard models.

Model 1: Adjusted for age, age<sup>2</sup>, sex, PC 1-20, genotyping array, country, Townsend deprivation index

Model 2: Adjusted for age, age<sup>2</sup>, sex, PC 1-20, genotyping array, country, Townsend deprivation index, smoking status, pack-year smoking history, alcohol intake, vegetable + fresh fruit intake, days per week of moderate and vigorous exercise, sleep duration, systolic blood pressure, antihypertensive medication use, non-HDL cholesterol, cholesterol-lowering medication use, antiplatelet medication use, antihyperglycemic medication use, prevalent type 2 diabetes mellitus (models for coronary artery disease and atrial fibrillation only), body-mass index, C-reactive protein

**Supplementary Table 4. Hazard ratios for incident cardiometabolic and cardiovascular disease associated with frequency of depression, excluding individuals (n=25,092) with prevalent coronary artery disease, type 2 diabetes, atrial fibrillation, ischemic stroke, peripheral artery disease, and/or heart failure from all models.**

| Condition                | Frequency of depressed mood | No. at risk | Model 1               |                        | Model 2               |                        |
|--------------------------|-----------------------------|-------------|-----------------------|------------------------|-----------------------|------------------------|
|                          |                             |             | Hazard ratio (95% CI) | P-value                | Hazard ratio (95% CI) | P-value                |
| Coronary artery disease  | High                        | 11,769      | 1.00<br>(reference)   | --                     | 1.00<br>(reference)   | --                     |
|                          | Moderate                    | 55,361      | 0.72<br>(0.67-0.78)   | <2.2x10 <sup>-16</sup> | 0.78<br>(0.71-0.85)   | 1.8x10 <sup>-8</sup>   |
|                          | Low                         | 235,930     | 0.56<br>(0.52-0.61)   | <2.2x10 <sup>-16</sup> | 0.66<br>(0.61-0.72)   | <2.2x10 <sup>-16</sup> |
| Type 2 diabetes mellitus | High                        | 11,769      | 1.00<br>(reference)   | --                     | 1.00<br>(reference)   | --                     |
|                          | Moderate                    | 55,361      | 0.64<br>(0.59-0.70)   | <2.2x10 <sup>-16</sup> | 0.79<br>(0.72-0.86)   | 8.7x10 <sup>-9</sup>   |
|                          | Low                         | 235,930     | 0.49<br>(0.46-0.53)   | <2.2x10 <sup>-16</sup> | 0.66<br>(0.61-0.72)   | <2.2x10 <sup>-16</sup> |
| Atrial fibrillation      | High                        | 11,769      | 1.00<br>(reference)   | --                     | 1.00<br>(reference)   | --                     |
|                          | Moderate                    | 55,361      | 0.82<br>(0.74-0.91)   | 9.1x10 <sup>-5</sup>   | 0.86<br>(0.77-0.96)   | 0.01                   |
|                          | Low                         | 235,930     | 0.77<br>(0.70-0.84)   | 1.4x10 <sup>-8</sup>   | 0.83<br>(0.75-0.92)   | 3.3x10 <sup>-4</sup>   |

Two-sided P-values (unadjusted for multiple comparisons) were calculated using multivariable-adjusted Cox proportional hazard models.

Model 1: Adjusted for age, age<sup>2</sup>, sex, PC 1-20, genotyping array, country, Townsend deprivation index

Model 2: Adjusted for age, age<sup>2</sup>, sex, PC 1-20, genotyping array, country, Townsend deprivation index, smoking status, pack-year smoking history, alcohol intake, vegetable + fresh fruit intake, days per week of moderate and vigorous exercise, sleep duration, systolic blood pressure, antihypertensive medication use, non-HDL cholesterol, cholesterol-lowering medication use, antiplatelet medication use, antihyperglycemic medication use, body-mass index, C-reactive protein, and polygenic risk

**Supplementary Table 5. Hazard ratios for incident cardiometabolic disease associated with frequency of depression, accounting for antidepressant medication use.**

| Condition                | Frequency of depressed mood | Further adjusted for antidepressant medication use |                       |                        | Excluding those (n=21,180) using antidepressant medications |                       |                        |
|--------------------------|-----------------------------|----------------------------------------------------|-----------------------|------------------------|-------------------------------------------------------------|-----------------------|------------------------|
|                          |                             | No. at risk                                        | Hazard ratio (95% CI) | P-value                | No. at risk                                                 | Hazard ratio (95% CI) | P-value                |
| Coronary artery disease  | High                        | 12,400                                             | 1.00 (reference)      | --                     | 9,161                                                       | 1.00 (reference)      | --                     |
|                          | Moderate                    | 57,574                                             | 0.79 (0.73-0.86)      | 2.9x10 <sup>-8</sup>   | 50,262                                                      | 0.78 (0.71-0.86)      | 5.0x10 <sup>-7</sup>   |
|                          | Low                         | 244,919                                            | 0.69 (0.64-0.74)      | <2.2x10 <sup>-16</sup> | 235,479                                                     | 0.68 (0.62-0.74)      | <2.2x10 <sup>-16</sup> |
| Type 2 diabetes mellitus | High                        | 12,623                                             | 1.00 (reference)      | --                     | 9,337                                                       | 1.00 (reference)      | --                     |
|                          | Moderate                    | 58,554                                             | 0.82 (0.75-0.89)      | 4.9x10 <sup>-6</sup>   | 51,172                                                      | 0.83 (0.75-0.92)      | 4.2x10 <sup>-4</sup>   |
|                          | Low                         | 250,072                                            | 0.72 (0.67-0.78)      | 8.6x10 <sup>-16</sup>  | 240,498                                                     | 0.69 (0.63-0.76)      | 6.8x10 <sup>-14</sup>  |
| Atrial fibrillation      | High                        | 12,927                                             | 1.00 (reference)      | --                     | 9,503                                                       | 1.00 (reference)      | --                     |
|                          | Moderate                    | 59,001                                             | 0.86 (0.78-0.94)      | 0.002                  | 51,392                                                      | 0.86 (0.77-0.96)      | 0.006                  |
|                          | Low                         | 250,553                                            | 0.81 (0.74-0.89)      | 4.0x10 <sup>-6</sup>   | 240,770                                                     | 0.80 (0.72-0.89)      | 3.8x10 <sup>-5</sup>   |

Two-sided P-values (unadjusted for multiple comparisons) were calculated using multivariable-adjusted Cox proportional hazard models. Adjusted for age, age<sup>2</sup>, sex, PC 1-20, genotyping array, country, Townsend deprivation index, smoking status, pack-year smoking history, alcohol intake, vegetable + fresh fruit intake, days per week of moderate and vigorous exercise, sleep duration, systolic blood pressure, antihypertensive medication use, non-HDL cholesterol, cholesterol-lowering medication use, antiplatelet medication use, antihyperglycemic medication use, prevalent type 2 diabetes mellitus (models for coronary artery disease and atrial fibrillation only), body-mass index, C-reactive protein, and polygenic risk

**Supplementary Table 6. Hazard ratios for incident cardiometabolic and cardiovascular disease, with follow-up truncated at December 31, 2019.**

| Condition                | Frequency of depressed mood | No. at risk | Model 1               |                        | Model 2               |                        |
|--------------------------|-----------------------------|-------------|-----------------------|------------------------|-----------------------|------------------------|
|                          |                             |             | Hazard ratio (95% CI) | P-value                | Hazard ratio (95% CI) | P-value                |
| Coronary artery disease  | High                        | 11,769      | 1.00<br>(reference)   | --                     | 1.00<br>(reference)   | --                     |
|                          | Moderate                    | 55,361      | 0.70<br>(0.65-0.75)   | <2.2x10 <sup>-16</sup> | 0.77<br>(0.71-0.84)   | 4.4x10 <sup>-10</sup>  |
|                          | Low                         | 235,930     | 0.55<br>(0.51-0.59)   | <2.2x10 <sup>-16</sup> | 0.66<br>(0.61-0.71)   | <2.2x10 <sup>-16</sup> |
| Type 2 diabetes mellitus | High                        | 11,769      | 1.00<br>(reference)   | --                     | 1.00<br>(reference)   | --                     |
|                          | Moderate                    | 55,361      | 0.65<br>(0.60-0.70)   | <2.2x10 <sup>-16</sup> | 0.79<br>(0.72-0.86)   | 2.5x10 <sup>-8</sup>   |
|                          | Low                         | 235,930     | 0.50<br>(0.46-0.53)   | <2.2x10 <sup>-16</sup> | 0.67<br>(0.62-0.72)   | <2.2x10 <sup>-16</sup> |
| Atrial fibrillation      | High                        | 11,769      | 1.00<br>(reference)   | --                     | 1.00<br>(reference)   | --                     |
|                          | Moderate                    | 55,361      | 0.80<br>(0.74-0.88)   | 1.4x10 <sup>-6</sup>   | 0.85<br>(0.77-0.94)   | 0.002                  |
|                          | Low                         | 235,930     | 0.72<br>(0.66-0.78)   | 2.3x10 <sup>-15</sup>  | 0.80<br>(0.73-0.88)   | 2.4x10 <sup>-6</sup>   |

Two-sided P-values (unadjusted for multiple comparisons) were calculated using multivariable-adjusted Cox proportional hazard models.

Model 1: Adjusted for age, age<sup>2</sup>, sex, PC 1-20, genotyping array, country, Townsend deprivation index

Model 2: Adjusted for age, age<sup>2</sup>, sex, PC 1-20, genotyping array, country, Townsend deprivation index, smoking status, pack-year smoking history, alcohol intake, vegetable + fresh fruit intake, days per week of moderate and vigorous exercise, sleep duration, systolic blood pressure, antihypertensive medication use, non-HDL cholesterol, cholesterol-lowering medication use, antiplatelet medication use, antihyperglycemic medication use, body-mass index, C-reactive protein, and polygenic risk



**Supplementary Table 7. Hazard ratios for incident cardiometabolic disease associated with Patient Health Questionnaire-2 (PHQ-2) score.**

| Condition                | PHQ-2 score | No. at risk | Model 1               |                        | Model 2               |                        |
|--------------------------|-------------|-------------|-----------------------|------------------------|-----------------------|------------------------|
|                          |             |             | Hazard ratio (95% CI) | P-value                | Hazard ratio (95% CI) | P-value                |
| Coronary artery disease  | 3-6         | 14,364      | 1.00<br>(reference)   | --                     | 1.00<br>(reference)   | --                     |
|                          | 1-2         | 69,955      | 0.74<br>(0.69-0.79)   | <2.2x10 <sup>-16</sup> | 0.82<br>(0.76-0.89)   | 3.6x10 <sup>-7</sup>   |
|                          | 0           | 225,787     | 0.58<br>(0.54-0.61)   | <2.2x10 <sup>-16</sup> | 0.70<br>(0.65-0.75)   | <2.2x10 <sup>-16</sup> |
|                          |             |             |                       |                        |                       |                        |
|                          | 3-6         | 14,364      | 1.00<br>(reference)   | --                     | 1.00<br>(reference)   | --                     |
|                          | 0-1         | 261,985     | 0.59<br>(0.55-0.63)   | <2.2x10 <sup>-16</sup> | 0.71<br>(0.66-0.77)   | <2.2x10 <sup>-16</sup> |
| Type 2 diabetes mellitus | 3-6         | 14,639      | 1.00<br>(reference)   | --                     | 1.00<br>(reference)   | --                     |
|                          | 1-2         | 71,239      | 0.63<br>(0.59-0.67)   | <2.2x10 <sup>-16</sup> | 0.77<br>(0.72-0.83)   | 2.3x10 <sup>-11</sup>  |
|                          | 0           | 230,507     | 0.47<br>(0.44-0.50)   | <2.2x10 <sup>-16</sup> | 0.66<br>(0.61-0.71)   | <2.2x10 <sup>-16</sup> |
|                          |             |             |                       |                        |                       |                        |
|                          | 3-6         | 14,639      | 1.00<br>(reference)   | --                     | 1.00<br>(reference)   | --                     |
|                          | 0-1         | 267,361     | 0.48<br>(0.45-0.51)   | <2.2x10 <sup>-16</sup> | 0.66<br>(0.62-0.71)   | <2.2x10 <sup>-16</sup> |
| Atrial fibrillation      | 3-6         | 14,980      | 1.00<br>(reference)   | --                     | 1.00<br>(reference)   | --                     |
|                          | 1-2         | 71,771      | 0.83<br>(0.76-0.89)   | 2.3x10 <sup>-6</sup>   | 0.85<br>(0.78-0.93)   | 4.3x10 <sup>-4</sup>   |
|                          | 0           | 230,792     | 0.72<br>(0.67-0.78)   | <2.2x10 <sup>-16</sup> | 0.81<br>(0.74-0.88)   | 3.5x10 <sup>-7</sup>   |
|                          |             |             |                       |                        |                       |                        |
|                          | 3-6         | 14,980      | 1.00<br>(reference)   | --                     | 1.00<br>(reference)   | --                     |
|                          | 0-1         | 267,804     | 0.73<br>(0.68-0.79)   | <2.2x10 <sup>-16</sup> | 0.81<br>(0.74-0.88)   | 5.8x10 <sup>-7</sup>   |

Two-sided P-values (unadjusted for multiple comparisons) were calculated using multivariable-adjusted Cox proportional hazard models.

Model 1: Adjusted for age, age<sup>2</sup>, sex, PC 1-20, genotyping array, country, Townsend deprivation index

Model 2: Adjusted for age, age<sup>2</sup>, sex, PC 1-20, genotyping array, country, Townsend deprivation index, smoking status, pack-year smoking history, alcohol intake, vegetable + fresh fruit intake, days per week of moderate and vigorous exercise, sleep duration, systolic blood pressure, antihypertensive medication use, non-HDL cholesterol, cholesterol-lowering medication use, antiplatelet medication use, antihyperglycemic medication use, prevalent type 2 diabetes mellitus (models for coronary artery disease and atrial fibrillation models only), body-mass index, C-reactive protein, and polygenic risk

**Supplementary Table 8. Interactions between polygenic risk and frequency of depressed mood.**

| <b>Condition</b>         | <b>Hazard ratio for interaction between polygenic risk and frequency of depressed mood (95% CI)</b> | <b>P-value for interaction</b> |
|--------------------------|-----------------------------------------------------------------------------------------------------|--------------------------------|
| Coronary artery disease  | 0.95<br>(0.93-0.98)                                                                                 | 0.002                          |
| Type 2 diabetes mellitus | 1.00<br>(0.97-1.04)                                                                                 | 0.85                           |
| Atrial fibrillation      | 0.97<br>(0.94-1.01)                                                                                 | 0.12                           |

Two-sided P-values (unadjusted for multiple comparisons) were calculated using multivariable-adjusted Cox proportional hazard models.

Polygenic risk is modeled as a quantitative trait. Frequency of depressed mood is modeled as an ordinal variable.

Models are adjusted for age, age<sup>2</sup>, sex, PC 1-20, genotyping array, country, Townsend deprivation index, smoking status, pack-year smoking history, alcohol intake, vegetable + fresh fruit intake, days per week of moderate and vigorous exercise, sleep duration, systolic blood pressure, antihypertensive medication use, non-HDL cholesterol, cholesterol-lowering medication use, antiplatelet medication use, antihyperglycemic medication use, prevalent type 2 diabetes mellitus (models for coronary artery disease and atrial fibrillation models only), body-mass index, C-reactive protein, polygenic risk, frequency of depressed mood, and interaction terms between frequency of depressed mood and each covariate.

**Supplementary Table 9. Hazard ratios for incident coronary artery disease associated with frequency of depressed mood, stratified by polygenic risk tier.**

| Polygenic risk | Frequency of depressed mood | No. at risk | Model 1               |                        | Model 2               |                        |
|----------------|-----------------------------|-------------|-----------------------|------------------------|-----------------------|------------------------|
|                |                             |             | Hazard ratio (95% CI) | P-value                | Hazard ratio (95% CI) | P-value                |
| High           | High                        | 2,510       | 1.00<br>(reference)   | --                     | 1.00<br>(reference)   | --                     |
|                | Moderate                    | 11,305      | 0.73<br>(0.64-0.84)   | 1.0x10 <sup>-5</sup>   | 0.77<br>(0.66-0.90)   | 9.5x10 <sup>-4</sup>   |
|                | Low                         | 47,034      | 0.62<br>(0.54-0.70)   | 7.2x10 <sup>-14</sup>  | 0.70<br>(0.61-0.81)   | 1.2x10 <sup>-6</sup>   |
| Intermediate   | High                        | 7,441       | 1.00<br>(reference)   | --                     | 1.00<br>(reference)   | --                     |
|                | Moderate                    | 34,561      | 0.70<br>(0.64-0.78)   | 3.7x10 <sup>-13</sup>  | 0.79<br>(0.71-0.88)   | 1.5x10 <sup>-5</sup>   |
|                | Low                         | 147,593     | 0.54<br>(0.49-0.59)   | <2.2x10 <sup>-16</sup> | 0.66<br>(0.60-0.73)   | <2.2x10 <sup>-16</sup> |
| Low            | High                        | 2,449       | 1.00<br>(reference)   | --                     | 1.00<br>(reference)   | --                     |
|                | Moderate                    | 11,707      | 0.64<br>(0.53-0.77)   | 3.7x10 <sup>-6</sup>   | 0.73<br>(0.59-0.90)   | 0.003                  |
|                | Low                         | 50,292      | 0.47<br>(0.40-0.56)   | <2.2x10 <sup>-16</sup> | 0.57<br>(0.47-0.69)   | 1.7x10 <sup>-8</sup>   |

Two-sided P-values (unadjusted for multiple comparisons) were calculated using multivariable-adjusted Cox proportional hazard models.

Model 1: Adjusted for age, age<sup>2</sup>, sex, PC 1-20, genotyping array, country, Townsend deprivation index

Model 2: Adjusted for age, age<sup>2</sup>, sex, PC 1-20, genotyping array, country, Townsend deprivation index, smoking status, pack-year smoking history, alcohol intake, vegetable + fresh fruit intake, days per week of moderate and vigorous exercise, sleep duration, systolic blood pressure, antihypertensive medication use, non-HDL cholesterol, cholesterol-lowering medication use, antiplatelet medication use, antihyperglycemic medication use, prevalent type 2 diabetes mellitus, body-mass index, and C-reactive protein

**Supplementary Table 10. Interactions between polygenic risk and frequency of depressed mood for total coronary artery disease (prevalent and incident).**

| Condition               | Model 1                                |                         | Model 2                                |                         |
|-------------------------|----------------------------------------|-------------------------|----------------------------------------|-------------------------|
|                         | Odds ratio for interaction<br>(95% CI) | P-value for interaction | Odds ratio for interaction<br>(95% CI) | P-value for interaction |
| Coronary artery disease | 0.96<br>(0.94-0.98)                    | $6.4 \times 10^{-4}$    | 0.95<br>(0.92-0.97)                    | $6.6 \times 10^{-5}$    |

Two-sided P-values (unadjusted for multiple comparisons) were calculated using multivariable-adjusted logistic regression models.

Polygenic risk is modeled as a quantitative trait. Frequency of depressed mood is modeled as an ordinal variable.

Model 1: Adjusted for age, age<sup>2</sup>, sex, PC 1-20, genotyping array, country, Townsend deprivation index, polygenic risk, frequency of depressed mood

Model 2: Adjusted for age, age<sup>2</sup>, sex, PC 1-20, genotyping array, country, Townsend deprivation index, smoking status, pack-year smoking history, alcohol intake, vegetable + fresh fruit intake, days per week of moderate and vigorous exercise, sleep duration, systolic blood pressure, antihypertensive medication use, non-HDL cholesterol, cholesterol-lowering medication use, antiplatelet medication use, antihyperglycemic medication use, prevalent type 2 diabetes mellitus, body-mass index, C-reactive protein, polygenic risk, frequency of depressed mood, and interaction terms between frequency of depressed mood and each covariate

**Supplementary Table 11. Sex-stratified models for incident coronary artery disease.**

| Frequency of depressed mood | Men            |                       |                      | Women          |                       |                        |
|-----------------------------|----------------|-----------------------|----------------------|----------------|-----------------------|------------------------|
|                             | Number at risk | Hazard ratio (95% CI) | P-value              | Number at risk | Hazard ratio (95% CI) | P-value                |
| High                        | 4,844          | 1.00 (reference)      | --                   | 7,556          | 1.00 (reference)      | --                     |
| Moderate                    | 22,339         | 0.84 (0.75-0.94)      | 0.002                | 35,235         | 0.70 (0.62-0.79)      | 1.0x10 <sup>-8</sup>   |
| Low                         | 117,201        | 0.74 (0.67-0.81)      | 3.1x10 <sup>-9</sup> | 127,718        | 0.57 (0.51-0.63)      | <2.2x10 <sup>-16</sup> |

Two-sided P-values (unadjusted for multiple comparisons) were calculated using multivariable-adjusted Cox proportional hazard models. Model adjusted for age, age<sup>2</sup>, PC 1-20, genotyping array, country, Townsend deprivation index, smoking status, pack-year smoking history, alcohol intake, vegetable + fresh fruit intake, days per week of moderate and vigorous exercise, sleep duration, systolic blood pressure, antihypertensive medication use, non-HDL cholesterol, cholesterol-lowering medication use, antiplatelet medication use, antihyperglycemic medication use, prevalent type 2 diabetes mellitus, body-mass index, C-reactive protein, and polygenic risk

**Online Appendix. *International Classification of Diseases* and procedure codes used to ascertain incident coronary artery disease, type 2 diabetes mellitus, and atrial fibrillation in the UK Biobank.**

| <b>Diagnosis</b>         | <b>ICD codes</b>                                                                                                                                                                                                                                                                                                                                                                                                                                                                                                                                                                                                                                                                                                                                    |
|--------------------------|-----------------------------------------------------------------------------------------------------------------------------------------------------------------------------------------------------------------------------------------------------------------------------------------------------------------------------------------------------------------------------------------------------------------------------------------------------------------------------------------------------------------------------------------------------------------------------------------------------------------------------------------------------------------------------------------------------------------------------------------------------|
| Coronary artery disease  | ICD 9: 410, 4109, 411, 4119, 412, 4129, 4140, 4148, 4149<br>ICD 10: I21, I21.0, I21.1, I21.2, I21.3, I21.4, I21.9, I22, I22.0, I22.1, I22.8, I22.9, I23, I23.0, I23.1, I23.2, I23.3, I23.4, I23.5, I23.6, I23.8, I24, I24.0, I24.1, I24.8, I24.9, I25.1, I25.2, I25.5, I25.6, I25.8, I25.9<br>OPCS-4: K40, K40.1, K40.2, K40.3, K40.4, K40.8, K40.9, K41, K41.1, K41.2, K41.3, K41.4, K41.8, K41.9, K42, K42.1, K42.2, K42.3, K42.4, K42.8, K42.9, K43, K43.1, K43.2, K43.3, K43.4, K43.8, K43.9, K44, K44.1, K44.2, K44.8, K44.9, K45.1, K45.2, K45.3, K45.4, K45.5, K45.6, K45.8, K45.9, K46.1, K46.2, K46.3, K46.4, K46.5, K46.8, K46.9, K49.1, K49.2, K49.3, K49.4, K49.8, K49.9, K50.1, K50.2, K50.4, K75.1, K75.2, K75.3, K75.4, K75.8, K75.9 |
| Type 2 diabetes mellitus | ICD-10: E11, E11.0, E11.1, E11.2, E11.3, E11.4, E11.5, E11.6, E11.7, E11.9, E11.9                                                                                                                                                                                                                                                                                                                                                                                                                                                                                                                                                                                                                                                                   |
| Atrial fibrillation      | ICD 9: 4273<br>ICD 10: I48.0, I48.1, I48.2, I48.3, I48.4, I48.9                                                                                                                                                                                                                                                                                                                                                                                                                                                                                                                                                                                                                                                                                     |
